# Supplementary material for: Tumor image-derived texture features are associated with CD3 T-cell infiltration status in glioblastoma
Source: PubMed Central journal article supplement (PMC5731870; doi:10.18632/oncotarget.20643), 2017-09-05
Supplement: oncotarget-08-101244-s001.pdf [file oncotarget-08-101244-s001.pdf]

## Tumor image-derived texture features are associated with CD3 T-cell infiltration status in glioblastoma

### SUPPLEMENTARY MATERIALS

Supplementary Table 1: TCGA patient list used for this study

See Supplementary File 1

Supplementary Table 2: Range in Voxel dimensions (in mm) along x, y, and z directions for TCGA and Internal patients

|     | TCGA  |       |       | MD Anderson |       |       |
|-----|-------|-------|-------|-------------|-------|-------|
|     | x     | y     | z     | x           | y     | z     |
| min | 0.469 | 0.469 | 0.700 | 0.430       | 0.430 | 1.800 |
| max | 1.016 | 1.016 | 6.500 | 0.977       | 0.977 | 7.501 |
